# Supplementary material for: Tartary Buckwheat Extract Attenuated the Obesity-Induced Inflammation and Increased Muscle PGC-1a/SIRT1 Expression in High Fat Diet-Induced Obese Rats
Source: PubMed Central journal article supplement (PMC6471111; doi:10.3390/nu11030654), 2019-03-18
Supplement: nutrients-11-00654-s001.pdf [file nutrients-11-00654-s001.pdf]

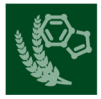

**Table S1.** Primers used for quantitative real time PCR

| Name            | GeneBank No.   | Primer sequence (5'-3')                             |
|-----------------|----------------|-----------------------------------------------------|
| aP2             | NM_053365      | F: TCACCCCAGATGACAGGAAA<br>R: CATGACACATTCCACCACCA  |
| Arg1            | NM_017134.3    | F: ACATCGGCTTGCGAGATGTG<br>R: GCCAATTCCCAGCTTGTCCA  |
| C/EBP- $\alpha$ | NM_012524      | F: GCCAAGAAGTCGGTGGATAA<br>R: CGGTCATTGTCACTGGTCAA  |
| CD11c           | XM_006230382.3 | F: CAGAACCCGTCACCCAATG<br>R: GATGTACAGCGGAAGTGCA    |
| GAPDH           | NM_017008      | F: ACCACAGTCCATGCCATCAC<br>R: TCCACCACCCTGTTGCTGTA  |
| IL-6            | NM_012589      | F: ATAGTCCTTCCTACCCCAAC<br>R: TGCCGAGTAGACCTCATAGT  |
| iNOS            | NM_012611.3    | F: TCCTGCCACCTTGGAGTTCA<br>R: TGGTCACCTCCAGCACAAGA  |
| MCP-1           | NM_031530      | F: ACTCACCTGCTGCTACTCAT<br>R: CTACAGCTTCTTTGGGACAC  |
| PGC-1 $\alpha$  | NM_031347      | F: GCACCAGAAAACAGCTCCAA<br>R: TTAAGTGAAGTTGCCATCCCG |
| PPAR- $\gamma$  | NM_001145366   | F: TGTGGGGATAAAGCATCAGG<br>R: CAAGGCACTTCTGAAACCGA  |
| SIRT1           | XM_008772947.2 | F: AGGGAACCTCTGCCTCATCT<br>R: GAGGTGTTGGTGGCAACTCT  |
| TNF- $\alpha$   | NM_012675      | F: CCCCTTTATCGTCTACTCCT<br>R: ACTACTTCAGCGTCTCGTGT  |

aP2, adipocyte protein 2; Arg1, arginase 1; C/EBP- $\alpha$ , CCAAT/enhancer binding protein- $\alpha$ ; GAPDH, glyceraldehyde-3-phosphate dehydrogenase; IL-6, interleukin-6; iNOS, inducible nitric oxide synthase; MCP-1, monocyte chemoattractant protein-1; PGC-1 $\alpha$ , peroxisome proliferative activated receptor gamma coactivator-1 $\alpha$ ; PPAR- $\gamma$ , peroxisome proliferator-activated receptor- $\gamma$ ; SIRT1, sirtuin 1; TNF- $\alpha$ , tumor necrosis factor- $\alpha$ .
